# Supplementary material for: A human stem cell resource to decipher the biochemical and cellular basis of neurodevelopmental defects in Lowe syndrome
Source: PubMed Central journal article supplement (PMC8822356; doi:10.1242/bio.059066), 2022-02-04
Supplement: biolopen-11-059066-s1.pdf [file biolopen-11-059066-s1.pdf]

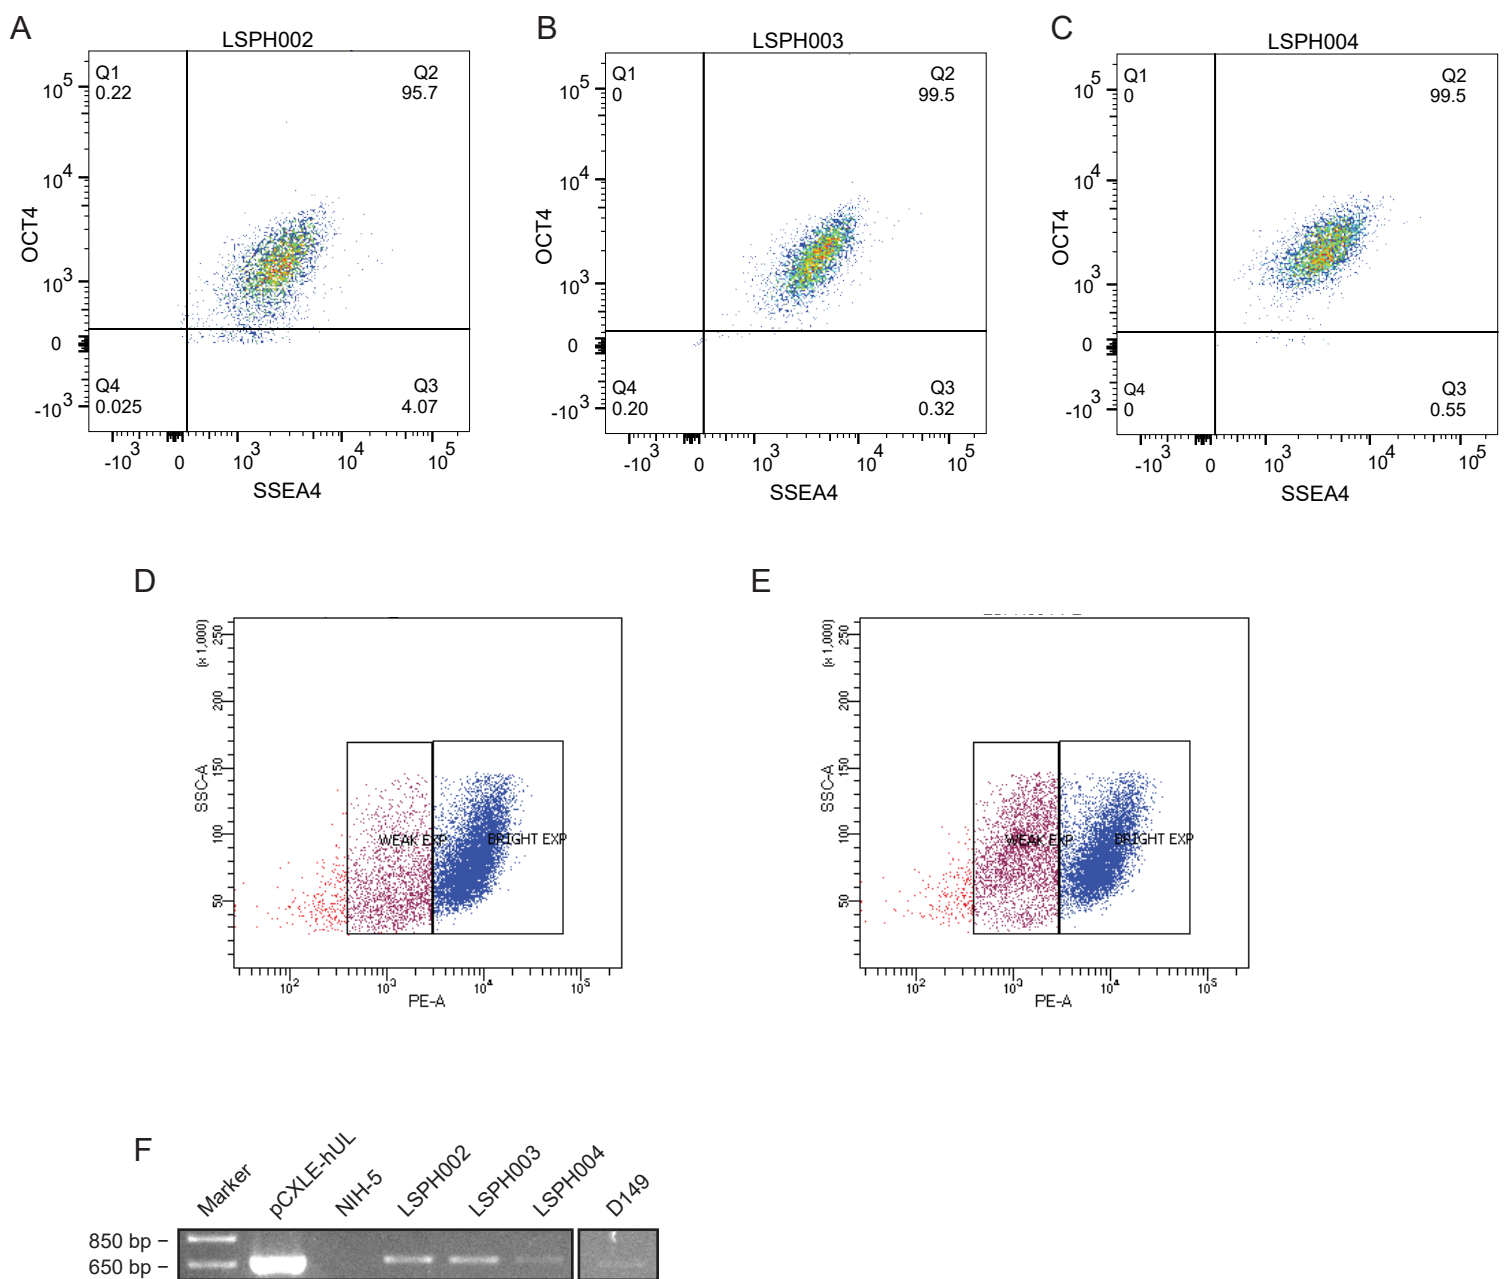

**Fig. S1.** (A-C) Presence of pluripotency markers OCT4 and SSEA4 in the hiPSC patient lines shown by quantitative FACS analysis. (D-E) Representative flow cytometry data to illustrate fluorescence activated cell sorting of NSCs using CD133-PE conjugated primary antibody. (F) PCR analysis of EBNA1 to assess plasmid footprint in feeder-free iPSC lines LSPH002, LSPH003 and LSPH004. Positive control - Plasmid pCXLE-hUL; Negative control - iPSC NIH5.

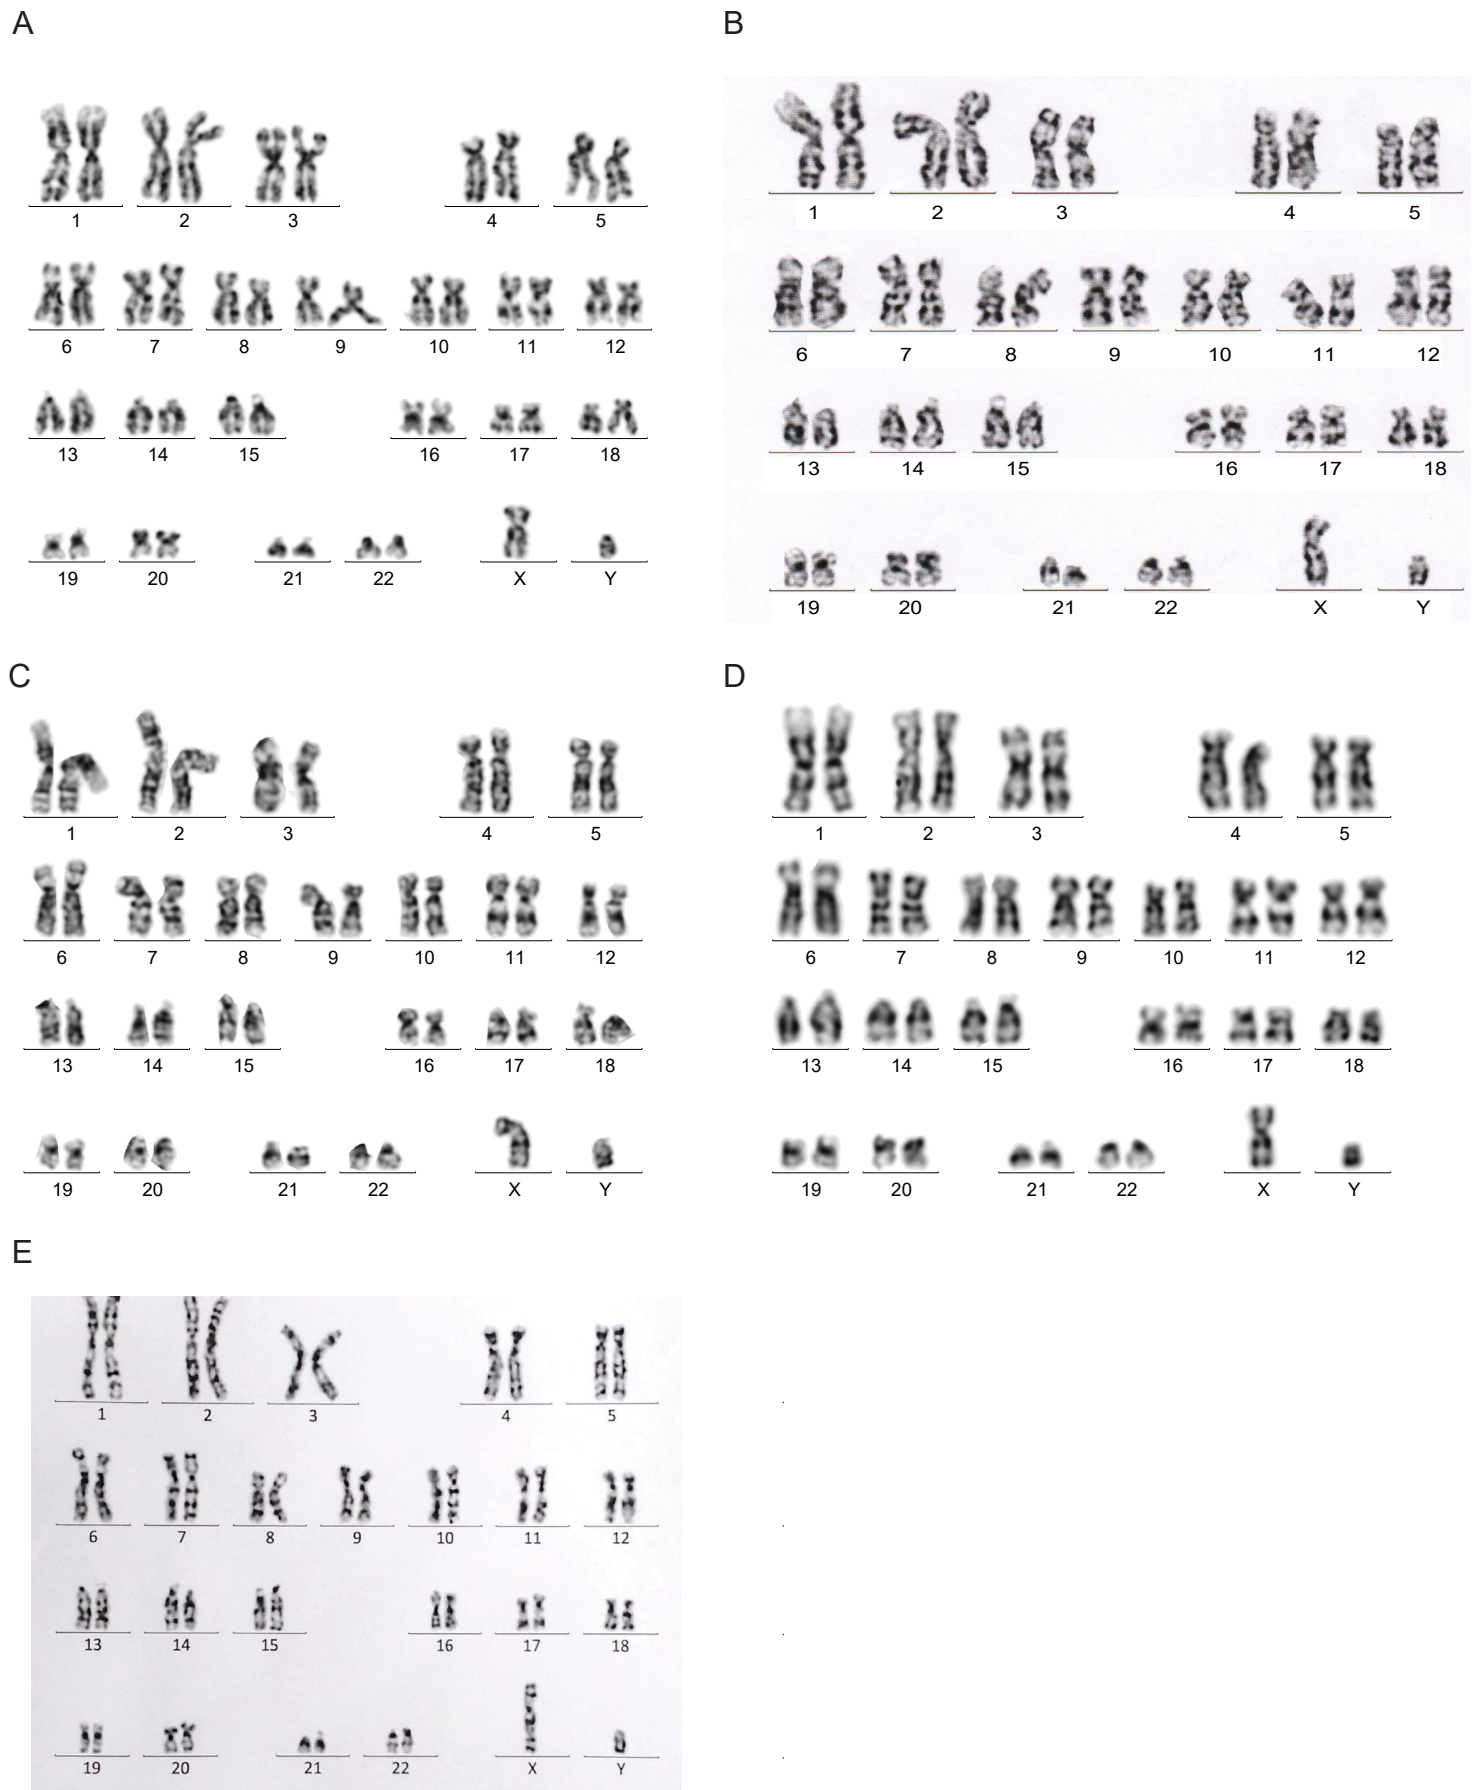

**Fig. S2.** Karyogram depicting the karyotype 46(X,Y) of (A) LCL LSPH002 (B) LCL LSPH003 (C) LCL LSPH004 (D) hiPSC LSPH002 (E) hiPSC LSPH003.

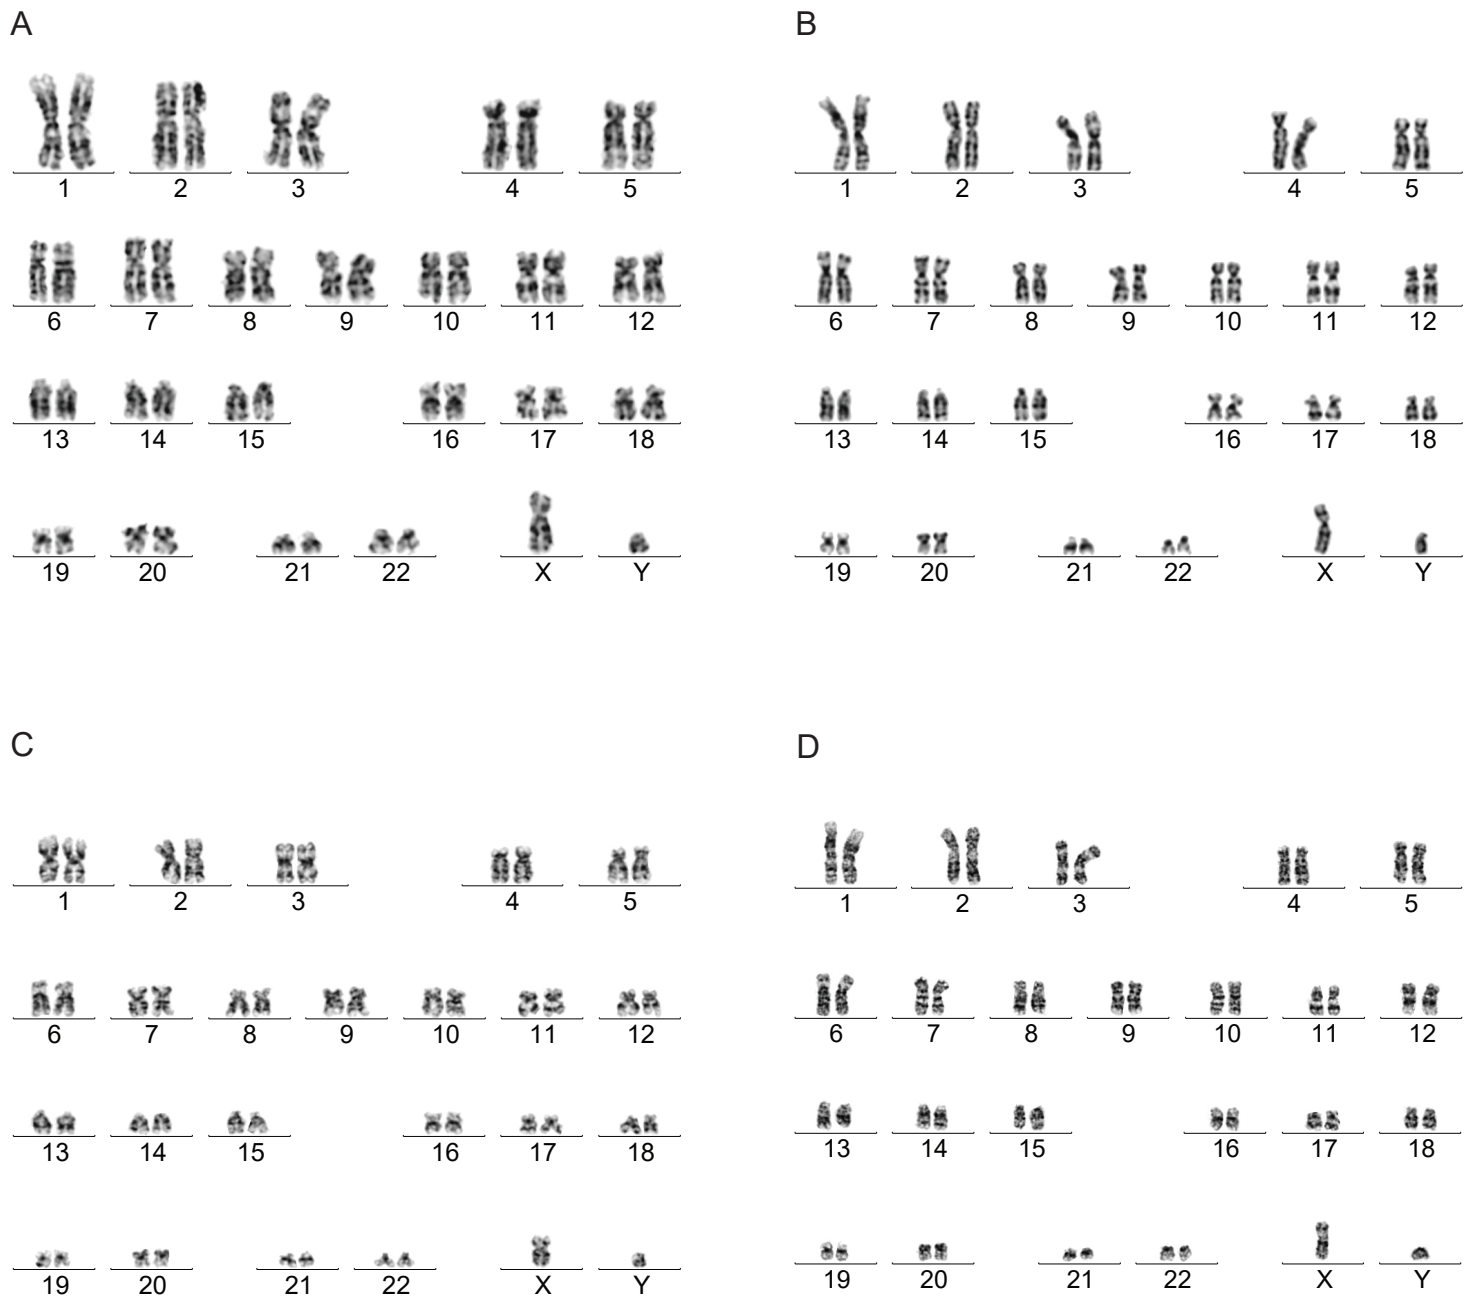

**Fig. S3.** Karyogram depicting the karyotype 46(X,Y) of (A) NSC D149 (B) NSC LSPH004 (C) NSC D149-GSH (D) NSC LSPH004-GSH.

**Table S1.** Short tandem repeat analysis of blood, LCL and iPSC derived DNA for LSPH002, LSP003 and LSPH004. Data for all ten loci assayed for STR is shown.

| GP Date    | Sample No. | Sample type | AMEL | CSF1PO | D13S317 | D16S539 | D21S11  | D5S818 | D7S820 | TH01 | TPOX  | vWA   |
|------------|------------|-------------|------|--------|---------|---------|---------|--------|--------|------|-------|-------|
| 24.04.2018 | LSPH002    | Blood       | X,Y  | 11,12  | 12,12   | 11,12   | 28,28   | 12,14  | 8,11   | 6,9  | 11,12 | 17,18 |
| 24.04.2018 | LSPH002    | LCL         | X,Y  | 11,12  | 12,12   | 11,12   | 28,28   | 12,14  | 8,11   | 6,9  | 11,12 | 17,18 |
| 24.04.2018 | LSPH002    | iPSC        | X,Y  | 11,12  | 12,12   | 11,12   | 28,28   | 12,14  | 8,11   | 6,9  | 11,12 | 17,18 |
| 24.04.2018 | LSPH003    | Blood       | X,Y  | 11,12  | 12,12   | 11,12   | 28,28   | 12,14  | 8,11   | 6,9  | 11,12 | 17,18 |
| 24.04.2018 | LSPH003    | LCL         | X,Y  | 11,12  | 12,12   | 11,12   | 28,28   | 12,14  | 8,11   | 6,9  | 11,12 | 17,18 |
| 24.04.2018 | LSPH003    | iPSC        | X,Y  | 11,12  | 12,12   | 11,12   | 28,28   | 12,14  | 8,11   | 6,9  | 11,12 | 17,18 |
| 24.04.2018 | LSPH004    | Blood       | X,Y  | 10,13  | 12,12   | 12,12   | 28,30.2 | 11,12  | 8,12   | 8,8  | 10,11 | 16,18 |
| 24.04.2018 | LSPH004    | LCL         | X,Y  | 10,13  | 12,12   | 12,12   | 28,30.2 | 11,12  | 8,12   | 8,8  | 10,11 | 16,18 |
| 24.04.2018 | LSPH004    | iPSC        | X,Y  | 10,13  | 12,12   | 12,12   | 28,30.2 | 11,12  | 8,12   | 8,8  | 10,11 | 16,18 |

**Table S2.** Table showing the list of GO categories with upregulated or downregulated genes in RNA derived from LSPH004 iPSC compared to controls. Individual genes included under each GO term is shown in a given row.

[Click here to download Table S2](#)

**Table S3.** Table showing the list of GO categories with upregulated or downregulated genes in RNA derived from LSPH004 NSC compared to controls. Individual genes included under each GO term is shown in a given row.

[Click here to download Table S3](#)

**Table S4.** Table showing the following: Sheet-Source parameters: the mass spectrometer instrument parameters for data acquisition Sheet- iPSC: Multiple reaction monitoring (MRM) parameters for detecting and quantifying PIP, PIP<sub>2</sub> and PE species from iPSC. Sheet- NSC: Multiple reaction monitoring (MRM) parameters for detecting and quantifying PIP, PIP<sub>2</sub> and PE species from NSC.

[Click here to download Table S4](#)

**Table S5.** List of PCR primers and antibodies in this study is presented in this table. A human stem cell resource to decipher the biochemical and cellular basis of neurodevelopmental defects in Lowe Syndrome.

| QRT-PCR primers                                          |                        |                               |                               |
|----------------------------------------------------------|------------------------|-------------------------------|-------------------------------|
| Gene name                                                | Forward primer (5'-3') | Reverse primer (5'-3')        |                               |
| inositol polyphosphate -5-phosphatase B (INPP5B)         | CAAATGGGAAGGGAGTGCCT   | ATGAGCCTTGTCCGACACTG          |                               |
| inositol polyphosphate -5-phosphatase D (INPP5D/SHIP1)   | GCACCTGGAACATGGGTAAC   | TGGGTGCCGATCACGTAAAT          |                               |
| Synaptojanin 1 (SYNJ1)                                   | CCTCACAACCGCAAGTAAAAAC | AGCTGAGCCTTTGATACAGCA         |                               |
| inositol polyphosphate -5-phosphatase J (INPP5J)         | CACCCTCCAAGGTGGACTC    | CCTTCCGAGGAAGCTGACATA         |                               |
| inositol polyphosphate phosphatase like 1 (INPPL1/SHIP2) | CCAACACCCTGGGGAACAAG   | AGTTTTGGTTCCTCCGAGCC          |                               |
| inositol polyphosphate -5-phosphatase F (INPP5F/SAC2)    | CTTCCAAGCCAAGGACCACT   | AGTAGATCAGTAGCGGGTTCG         |                               |
| inositol polyphosphate -5-phosphatase K (INPP5K/SKIP)    | ATCCTGGACCACGACCTCA    | CCACCGTAGCACCGATTTTT          |                               |
| OCRL inositol polyphosphate-5-phosphatase (OCRL)         | CCTCCCAAGTTGTTTTGGCA   | AGGAAGCTGTCTTCTTCCAAGT        |                               |
| inositol polyphosphate 5-phosphatase E (INPP5E)          | TCTTGTACAGAAGCCGCCAC   | GCCAACGGAATGTTGTCTCG          |                               |
| Synaptojanin 2 (SYNJ2)                                   | CTCTTCAGGAAGAGGCCAAG   | ACAGCTGGTTCAGGAAGAAGG         |                               |
| RT-PCR primers                                           |                        |                               |                               |
|                                                          | Target                 | Forward (5'-3')               | Reverse primer (5'-3')        |
| Housekeeping Genes                                       | Beta-Actin             | TCACCCACACTGTGCCCATC<br>TACGA | CAGCGGAACCGCTCATTGCC<br>AATGG |

|                         |                  |                       |                          |
|-------------------------|------------------|-----------------------|--------------------------|
| Differentiation Markers | SOX1 (Ectoderm)  | GGGAAAACGGGCAAATAAT   | CCATCTGGGCTTCAAGTGTT     |
| Differentiation Markers | Nodal (Mesoderm) | AGACATCATCCGCAGCCTACA | GACCTGGGACAAAGTGACAGTGAA |
| Differentiation Markers | GATA4 (Endoderm) | TCCAAACCAGAAAACGGAAG  | CTGTGCCCCTAGTGAGATGA     |

#### EB Footprint PCR

|                   | Gene name | Forward primer (5'-3') | Reverse primer (5'-3') |
|-------------------|-----------|------------------------|------------------------|
| Plasmid footprint | EBNA-1    | ATCGTCAAAGCTGCACACAG   | CCCAGGAGTCCCAGTAGTCA   |

#### Junctional PCR

|                | Forward primer (5'-3')  | Reverse primer (5'-3') |
|----------------|-------------------------|------------------------|
| Left Junction  | CTGTGTCTGAGCCTGCATGTTTG | GGACCTGCCTGGAGAAGGAT   |
| Right Junction | GACCCATGCAGTCCTCCTTAC   | CAGGAGGCCTTCCATCTGTTG  |

#### Antibodies used in this study

| Primary antibodies | Source              | Dilution | Company                  | Catalogue number | RRID        |
|--------------------|---------------------|----------|--------------------------|------------------|-------------|
| OCRL               | Rabbit (polyclonal) | 1:200    | Thermo Fisher Scientific | PA5-27844        | AB_2545320  |
| OCRL (C-2)         | Mouse (monoclonal)  | 1:500    | Santacruz                | sc-393577        |             |
| OCT4               | Rabbit              | 1:100    | Thermo Fisher Scientific | A24867           | AB_2650999  |
| SOX2               | Rat                 | 1:100    | Thermo Fisher Scientific | A24759           | AB_2651000  |
| SSEA4              | Mouse IgG3          | 1:100    | Thermo Fisher Scientific | A24866           | AB_2651001  |
| Nestin             | Mouse (monoclonal)  | 1:250    | Thermo Fisher Scientific | MA1-110          | AB_2536821  |
| SOX1               | Rabbit (polyclonal) | 1:200    | Abcam                    | ab87775          | AB_2616563  |
| SOX2               | Rabbit (monoclonal) | 1:200    | Abcam                    | ab92494          | AB_10585428 |
| Ki67               | Mouse (monoclonal)  | 1:200    | Abcam                    | ab8191           | AB_306346   |
| PAX6               | Mouse (monoclonal)  | 1:200    | Abcam                    | ab78545          | AB_1566562  |
| Musashi 1          | Rabbit (monoclonal) | 1:200    | Abcam                    | ab52865          | AB_881168   |

|                             |                             |        |                          |                         |               |
|-----------------------------|-----------------------------|--------|--------------------------|-------------------------|---------------|
| GAPDH                       | Rabbit (polyclonal)         | 1:1000 | NovusBio                 | NB100-56875             | AB_2107610    |
| mCherry                     | Rabbit (polyclonal)         | 1:1000 | Thermo Fisher Scientific | PA5-34974               | AB_2552323    |
| MAP2                        | Chicken (polyclonal)        | 1:1000 | Abcam                    | ab5392                  | AB_2138153    |
| DCX                         | Rabbit (polyclonal)         | 1:200  | Abcam                    | ab18723                 | AB_732011     |
| Synapsin-1                  | Rabbit (polyclonal)         | 1:200  | Abcam                    | ab64581                 | AB_1281135    |
| <b>Secondary antibodies</b> | <b>Species</b>              |        | <b>Company</b>           | <b>Catalogue number</b> | <b>RRID</b>   |
| Alexa Fluor™ 488            | Goat $\alpha$ -Mouse IgG    | 1:1000 | Thermo Fisher Scientific | A11001                  | AB_2534069    |
| Alexa Fluor™ 488            | Goat $\alpha$ -Rabbit IgG   | 1:1000 | Thermo Fisher Scientific | A11034                  | AB_2576217    |
| Alexa Fluor™ 568            | Donkey $\alpha$ -Rabbit IgG | 1:1000 | Thermo Fisher Scientific | A10042                  | AB_2534017    |
| Alexa Fluor™ 568            | Goat $\alpha$ -Mouse IgG    | 1:1000 | Thermo Fisher Scientific | A11004                  | AB_2534072    |
| Alexa Fluor™ 633            | Goat $\alpha$ -Rabbit IgG   | 1:1000 | Thermo Fisher Scientific | A21070                  | AB_2535731    |
| Alexa Fluor™ 594            | Donkey $\alpha$ -Rabbit     | 1:250  | Thermo Fisher Scientific | A24870                  | Not available |
| Alexa Fluor™ 488            | Donkey $\alpha$ -Rat        | 1:250  | Thermo Fisher Scientific | A24876                  | AB_2651007    |
| Alexa Fluor™ 488            | Goat $\alpha$ - Mouse IgG3  | 1:250  | Thermo Fisher Scientific | A24877                  | AB_2651008    |
| Alexa Fluor™ 568            | Goat $\alpha$ -Chicken IgG  | 1:1000 | Thermo Fisher Scientific | A11041                  | AB_2534098    |
